# Supplementary material for: Intra-urban spatial variability of surface ozone and carbon dioxide in Riverside, CA: viability and validation of low-cost sensors
Source: Copernicus journal article supplement (doi:10.5194/amt-2017-183), 2017-08-07
Supplement: Supplementary file 1 [file amt-2017-183-supplement.pdf]

Supplemental Material

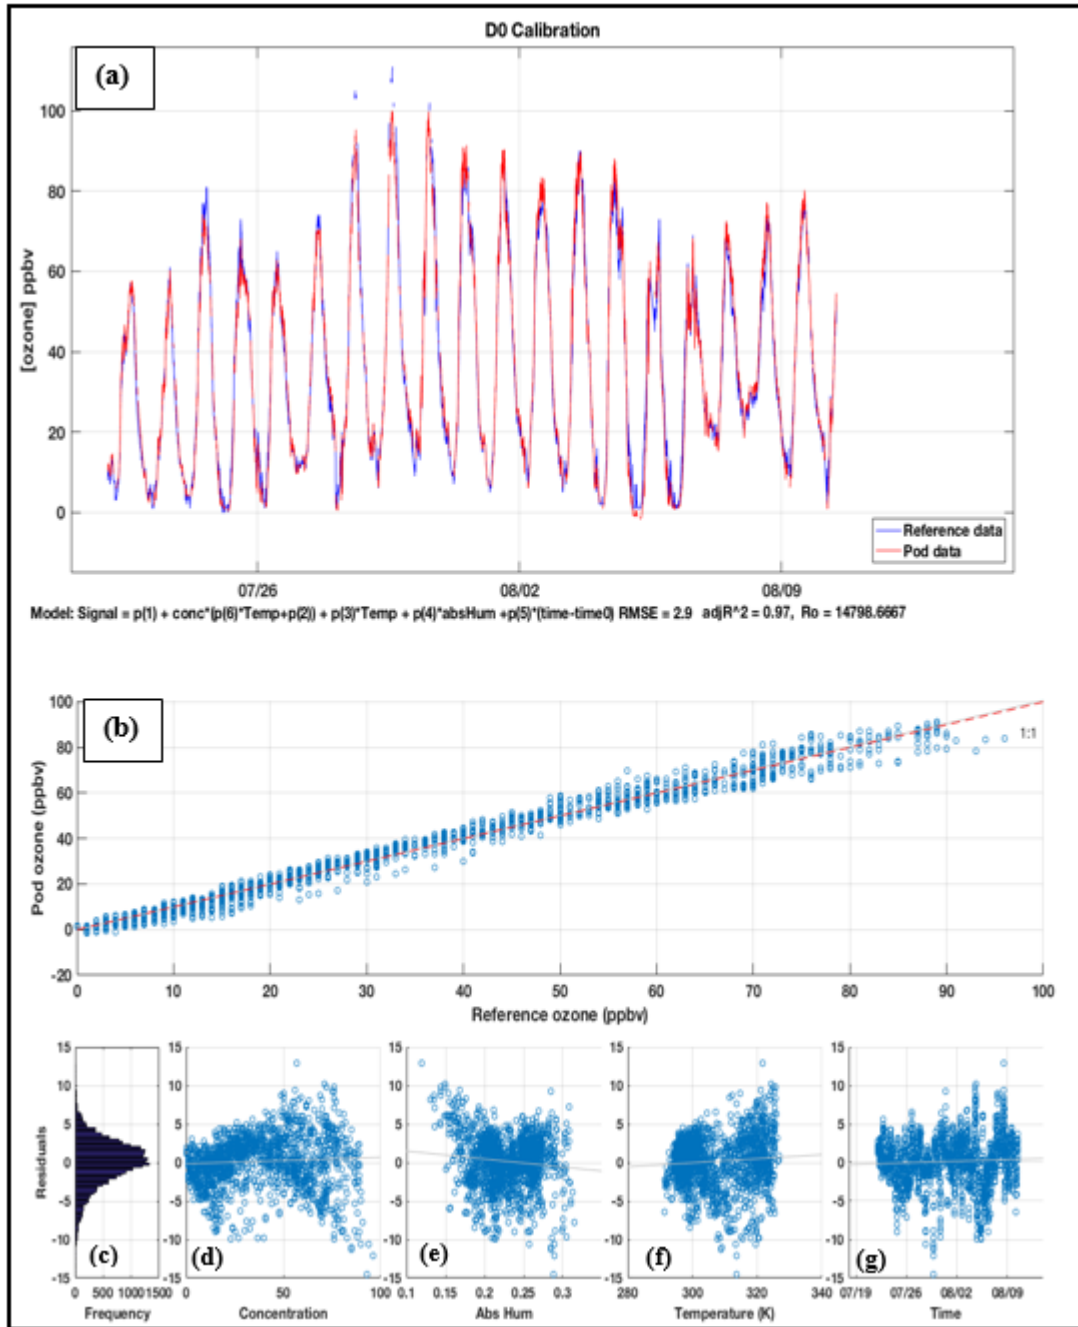

Figure S1. Panel (a) shows an example of a D0 ozone sensor time series with the reference monitor and (b) shows its calibration, (c) the distribution of residuals and the relationship between residual with different terms: (d) concentration (e) absolute humidity (f) temperature, and (g) time.

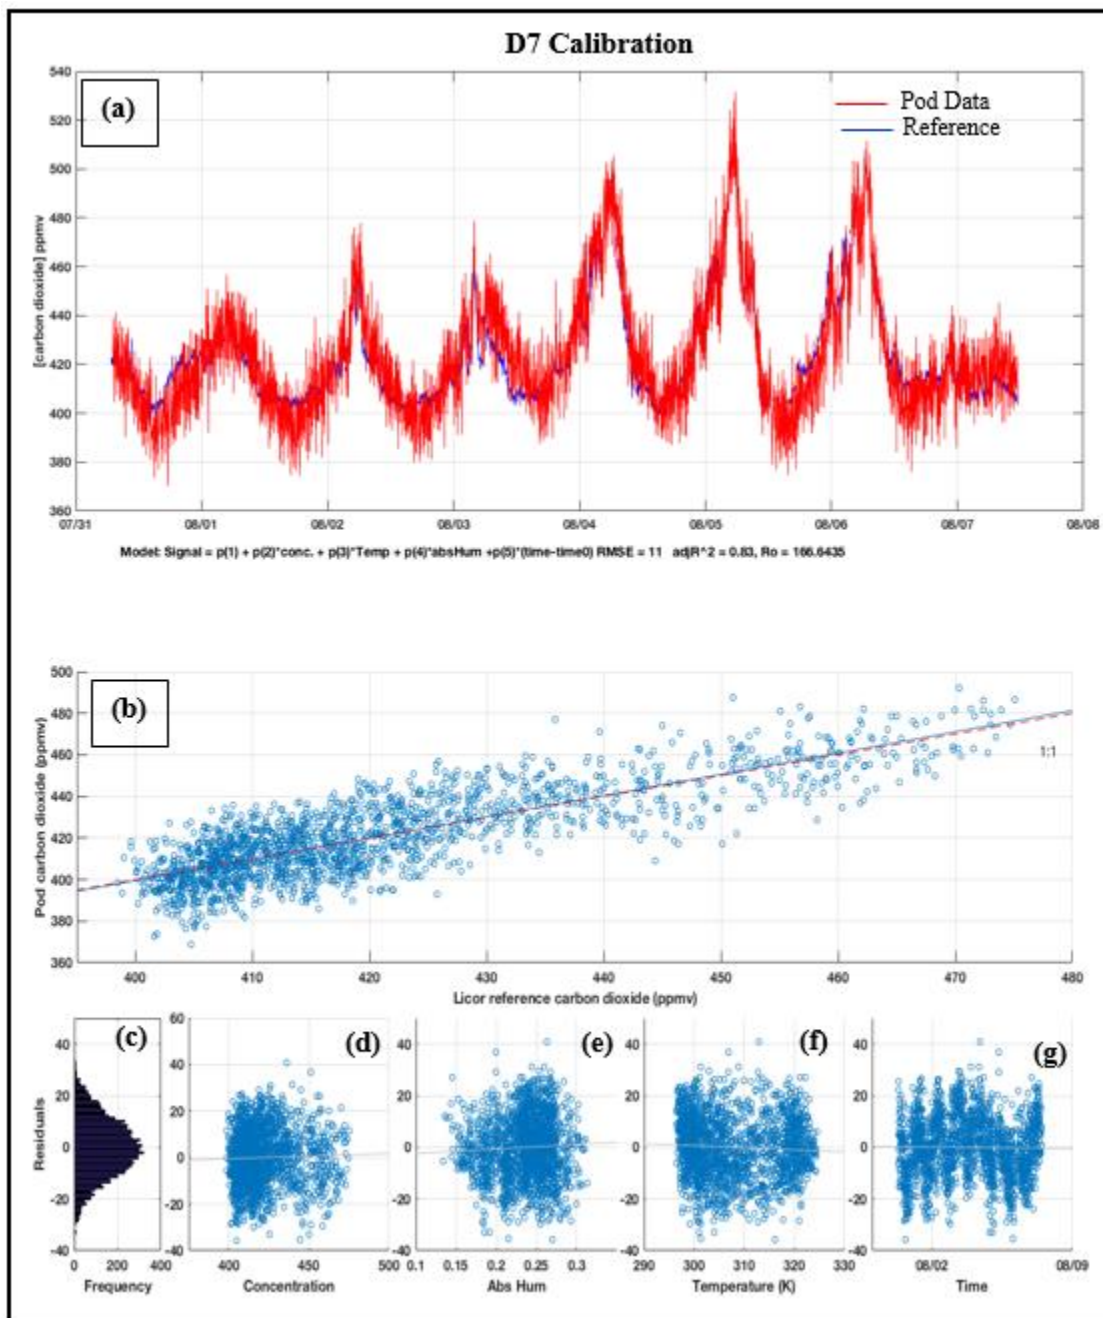

Figure S2. Panel (a) shows an example of a D7 CO<sub>2</sub> sensor time series with the reference monitor and (b) shows its calibration, (c) the distribution of residuals and the relationship between residual with different terms: (d) concentration (e) absolute humidity (f) temperature, and (g) time.

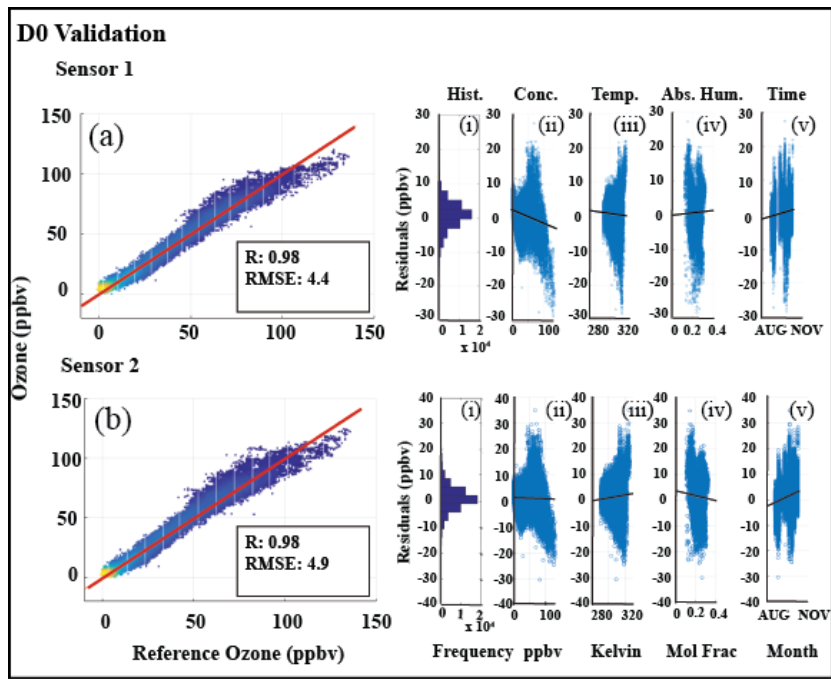

10

Figure S3. Panel (a) shows D0 sensor validation for the first sensor and (b) shows the same for the second sensor, with warmer shading showing a higher density of points. Then, from left to right for each sensor: a histogram of residuals (i), and then residuals against concentration (ii), temperature (iii), absolute humidity (iv) and time (v).

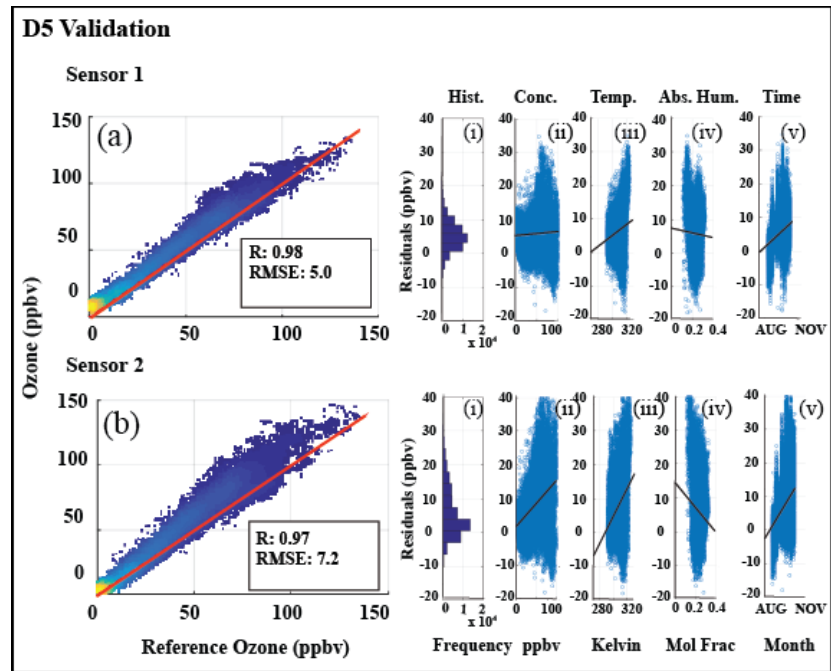

15

Figure S4. Panel (a) shows D5 sensor validation for the first sensor and (b) shows the same for the second sensor, with warmer shading showing a higher density of points. Then, from left to right for each sensor: a histogram of residuals (i), and then residuals against concentration (ii), temperature (iii), absolute humidity (iv) and time (v).

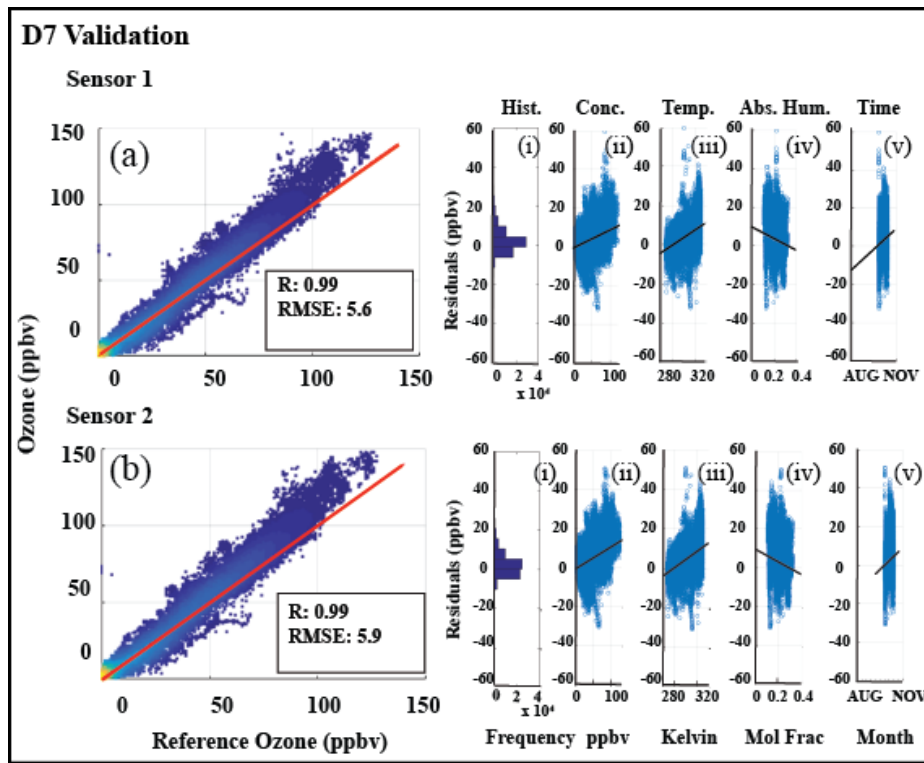

20

Figure S5. Panel (a) shows D7 sensor validation for the first sensor and (b) shows the same for the second sensor, with warmer shading showing a higher density of points. Then, from left to right for each sensor: a histogram of residuals (i), and then residuals against concentration (ii), temperature (iii), absolute humidity (iv) and time (v).

25

U-Pod ozone measurements tend to have more error at higher temperatures, which usually corresponds with higher ground level ozone. A temperature-concentration interaction term was included in the current calibration linear model to help account for this phenomenon but may not be addressing transient temperature effects on the ozone sensor or temperature/humidity sensors on board.

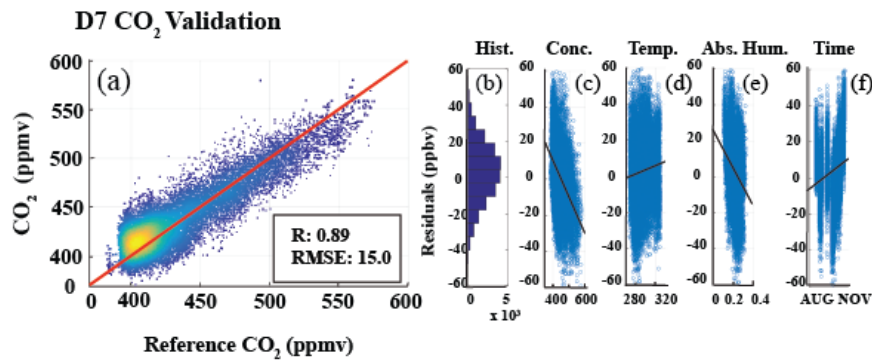

30

Figure S6. Panel (a) shows the linear 3 model with minute U-Pod D7 CO<sub>2</sub> measurements against reference - warmer shading shows higher density of points. The rest of the panels show (b) a histogram of residuals, residuals against concentration (c), temperature (d), absolute humidity (e) and time (f).

35

Table S1: Field calibration results of different regression models showing R<sup>2</sup>, RMSE (ppb/O<sub>3</sub>, ppm/CO<sub>2</sub>) for each gas-specific pod sensor signal. Two O<sub>3</sub> entries means there are two sensors in that U-Pod.

| U-Pod ID | Linear 3 (conc., temp, abshum) |                 | Linear 3T (conc., temp, abshum, temp conc.*) |                 | Linear 4 (conc., temp, abshum, time) |                 | Linear 4T (conc., temp, abshum, time, temp conc.) |                 |
|----------|--------------------------------|-----------------|----------------------------------------------|-----------------|--------------------------------------|-----------------|---------------------------------------------------|-----------------|
|          | O <sub>3</sub>                 | CO <sub>2</sub> | O <sub>3</sub>                               | CO <sub>2</sub> | O <sub>3</sub>                       | CO <sub>2</sub> | O <sub>3</sub>                                    | CO <sub>2</sub> |
| D0       | 0.88, 7.2                      | 0.75, 17        | 0.98, 3.3                                    | -               | 0.88, 7.0                            | 0.77, 14        | 0.97, 2.9                                         | -               |
|          | 0.86, 7.6                      |                 | 0.97, 3.4                                    |                 | 0.87, 7.4                            |                 | 0.97, 3.0                                         |                 |
| D3       | 0.83, 7.1                      | 0.55, 36        | 0.98, 2.5                                    | -               | 0.84, 7.4                            | 0.51, 26        | 0.97, 3.0                                         | -               |
|          | 0.85, 6.9                      |                 | 0.98, 2.7                                    |                 | 0.85, 8.0                            |                 | 0.97, 3.0                                         |                 |
| D4       | 0.84, 4.9                      | NA              | 0.96, 2.7                                    | NA              | 0.86, 5.2                            | NA              | 0.97, 2.5                                         | NA              |
|          | 0.83, 5.1                      |                 | 0.96, 2.2                                    |                 | 0.84, 5.5                            |                 | 0.97, 2.7                                         |                 |
| D5       | 0.90, 5.9                      | 0.80, 36        | 0.98, 2.5                                    | -               | 0.90, 5.6                            | 0.89, 20        | 0.98, 2.5                                         | -               |
|          | 0.87, 6.6                      |                 | 0.98, 2.9                                    |                 | 0.87, 6.5                            |                 | 0.97, 2.8                                         |                 |
| D6       | 0.82, 7.3                      | 0.63, 77        | 0.98, 2.9                                    | -               | 0.83, 7.6                            | 0.78, 75        | 0.95, 3.5                                         | -               |
|          | 0.90, 5.8                      |                 | 0.98, 2.4                                    |                 | 0.90, 5.8                            |                 | 0.98, 2.4                                         |                 |
| D7       | 0.87, 4.9                      | 0.86, 12        | 0.96, 3.3                                    | -               | -                                    | 0.83, 11        | 0.95, 3.0                                         | -               |
|          | 0.86, 5.0                      |                 | 0.94, 3.5                                    |                 | -                                    |                 | 0.95, 3.2                                         |                 |
| D8       | 0.90, 6.2                      | 0.84, 12        | 0.98, 2.9                                    | -               | 0.90, 6.2                            | 0.83, 11        | 0.97, 3.3                                         | -               |
| DA       | 0.82, 7.6                      | -               | 0.97, 4.3                                    | -               | 0.82, 7.6                            | 0.92, 9.0       | 0.97, 3.0                                         | -               |
|          | 0.81, 7.6                      |                 | 0.97, 4.3                                    |                 | 0.81, 7.6                            |                 | 0.97, 3.1                                         |                 |
| DB       | 0.57, 15                       | 0.49, 37        | 0.69, 17                                     | -               | 0.61, 14                             | 0.48, 25        | 0.97, 2.8                                         | -               |
| DC       | 0.87, 6.6                      | 0.56, 25        | 0.98, 2.6                                    | -               | 0.87, 6.6                            | 0.44, 29        | 0.97, 2.6                                         | -               |
|          | 0.89, 6.3                      |                 | 0.98, 2.8                                    |                 | 0.89, 6.2                            |                 | 0.97, 2.7                                         |                 |
| DD       | 0.89, 4.6                      | NA              | -                                            | NA              | 0.91, 4.6                            | NA              | 0.98, 1.8                                         | NA              |
|          | 0.91, 4.4                      |                 | -                                            |                 | 0.93, 4.2                            |                 | 0.98, 1.6                                         |                 |
| DE       | 0.85, 7.3                      | 0.77, 27        | 0.97, 2.9                                    | -               | 0.86, 7.4                            | 0.76, 36        | 0.96, 3.3                                         | -               |
|          | 0.91, 6.0                      |                 | 0.98, 2.7                                    |                 | 0.91, 6.0                            |                 | 0.97, 2.6                                         |                 |
| DF       | 0.87, 6.5                      | NA              | 0.98, 2.4                                    | NA              | 0.87, 6.6                            | NA              | 0.97, 3.1                                         | NA              |
|          | 0.90, 6.0                      |                 | 0.98, 2.5                                    |                 | 0.90, 6.0                            |                 | 0.97, 3.0                                         |                 |

\* temp|conc. is the interaction term between temperature and concentration, the second term in Eq. (1). Also note that these R<sup>2</sup> values are between reference signal in ppb or ppm and the sensor signal in volts, not between the reference concentration and the U-Pod, as they are in Table 1.

40

45

**Table S2. Percentage of original data lost from post-process filtering**

| U-Pod ID  | O <sub>3</sub> sensor 1 |     |      |     | O <sub>3</sub> sensor 2 |     |      |     | CO <sub>2</sub> |     |      |     | Totals |      |                 |
|-----------|-------------------------|-----|------|-----|-------------------------|-----|------|-----|-----------------|-----|------|-----|--------|------|-----------------|
|           | MM                      | CD  | AH   | T   | MM                      | CD  | AH   | T   | MM              | CD  | AH   | T   | Sen1   | Sen2 | CO <sub>2</sub> |
| <b>D0</b> | 0.0                     | 0.1 | 11.9 | 3.6 | 0.0                     | 0.2 | 11.9 | 3.5 | NaN             | 0.0 | 12.0 | 3.5 | 15.5   | 15.6 | 15.5            |
| <b>D3</b> | 0.0                     | 0.2 | 8.5  | 2.5 | 0.0                     | 0.2 | 8.5  | 2.5 | NaN             | 0.0 | 8.6  | 2.5 | 11.2   | 11.2 | 11.1            |
| <b>D4</b> | 0.0                     | 0.2 | 21.1 | 5.2 | 0.0                     | 0.2 | 21.2 | 5.2 | NaN             | NaN | NaN  | NaN | 26.6   | 26.7 | NaN             |
| <b>D5</b> | 0.0                     | 0.1 | 13.4 | 4.4 | 0.0                     | 0.2 | 13.5 | 4.4 | NaN             | 0.2 | 13.6 | 4.3 | 17.9   | 18.1 | 18.0            |
| <b>D6</b> | 0.0                     | 0.1 | 5.1  | 4.2 | 0.0                     | 0.1 | 5.2  | 4.2 | NaN             | 0.0 | 5.3  | 4.2 | 9.4    | 9.5  | 9.5             |
| <b>D7</b> | 0.1                     | 0.0 | 1.3  | 5.2 | 0.1                     | 0.0 | 1.3  | 5.3 | NaN             | 0.0 | 1.3  | 5.3 | 6.7    | 6.7  | 6.6             |
| <b>D8</b> | 0.0                     | 0.1 | 14.9 | 3.7 | NaN                     | NaN | NaN  | NaN | NaN             | 0.0 | 14.9 | 3.6 | 18.6   | NaN  | 18.5            |
| <b>DA</b> | 0.0                     | 0.0 | 20.8 | 4.6 | 0.0                     | 0.1 | 20.8 | 4.6 | NaN             | 0.0 | 21.0 | 4.6 | 25.4   | 25.4 | 25.6            |
| <b>DB</b> | 0.0                     | 0.1 | 2.7  | 2.3 | NaN                     | NaN | NaN  | NaN | NaN             | 0.0 | 2.7  | 2.3 | 5.1    | NaN  | 5.1             |
| <b>DC</b> | 0.1                     | 0.0 | 2.8  | 8.3 | 0.9                     | 0.2 | 2.5  | 8.0 | NaN             | 0.0 | 2.8  | 8.2 | 11.1   | 11.6 | 11.0            |
| <b>DD</b> | 0.0                     | 0.1 | 37.4 | 8.3 | 0.4                     | 0.1 | 37.2 | 8.3 | NaN             | NaN | NaN  | NaN | 45.8   | 45.9 | NaN             |
| <b>DE</b> | 0.0                     | 0.1 | 9.6  | 2.7 | 0.0                     | 0.0 | 9.7  | 2.7 | NaN             | 0.0 | 9.7  | 2.6 | 12.4   | 12.4 | 12.4            |
| <b>DF</b> | 0.0                     | 0.2 | 11.4 | 1.0 | 0.0                     | 0.2 | 11.4 | 1.0 | NaN             | NaN | NaN  | NaN | 12.6   | 12.6 | NaN             |

MM stands for minimum and maximum filtering. CD stands for consecutive differences, which were filtered if they exceeded 8 standard deviations away from the mean. AH stands for absolute humidity, filtered if the value was not observed during collocation. T stands for temperature, also filtered out if the value was not observed during collocation. Sen1 stands for ozone sensor 1, and sen2 stands for the second ozone sensor. CO<sub>2</sub> stands for the carbon dioxide sensor. NaN indicates there is either not a sensor, or this filtering method was not used.
